# Supplementary material
Source: PubMed Central journal article supplement (PMC3950538)
Supplement: NIHMS554991-supplement-Figure_S1.pdf [file NIHMS554991-supplement-Figure_S1.pdf]

Important PINK1 residues

▼ K219 Catalytic lysine

▼ D362 HRD motif

▼ M318 gatekeeper residue

▼ D384 DFG motif

▼ G309D PD mutation

A

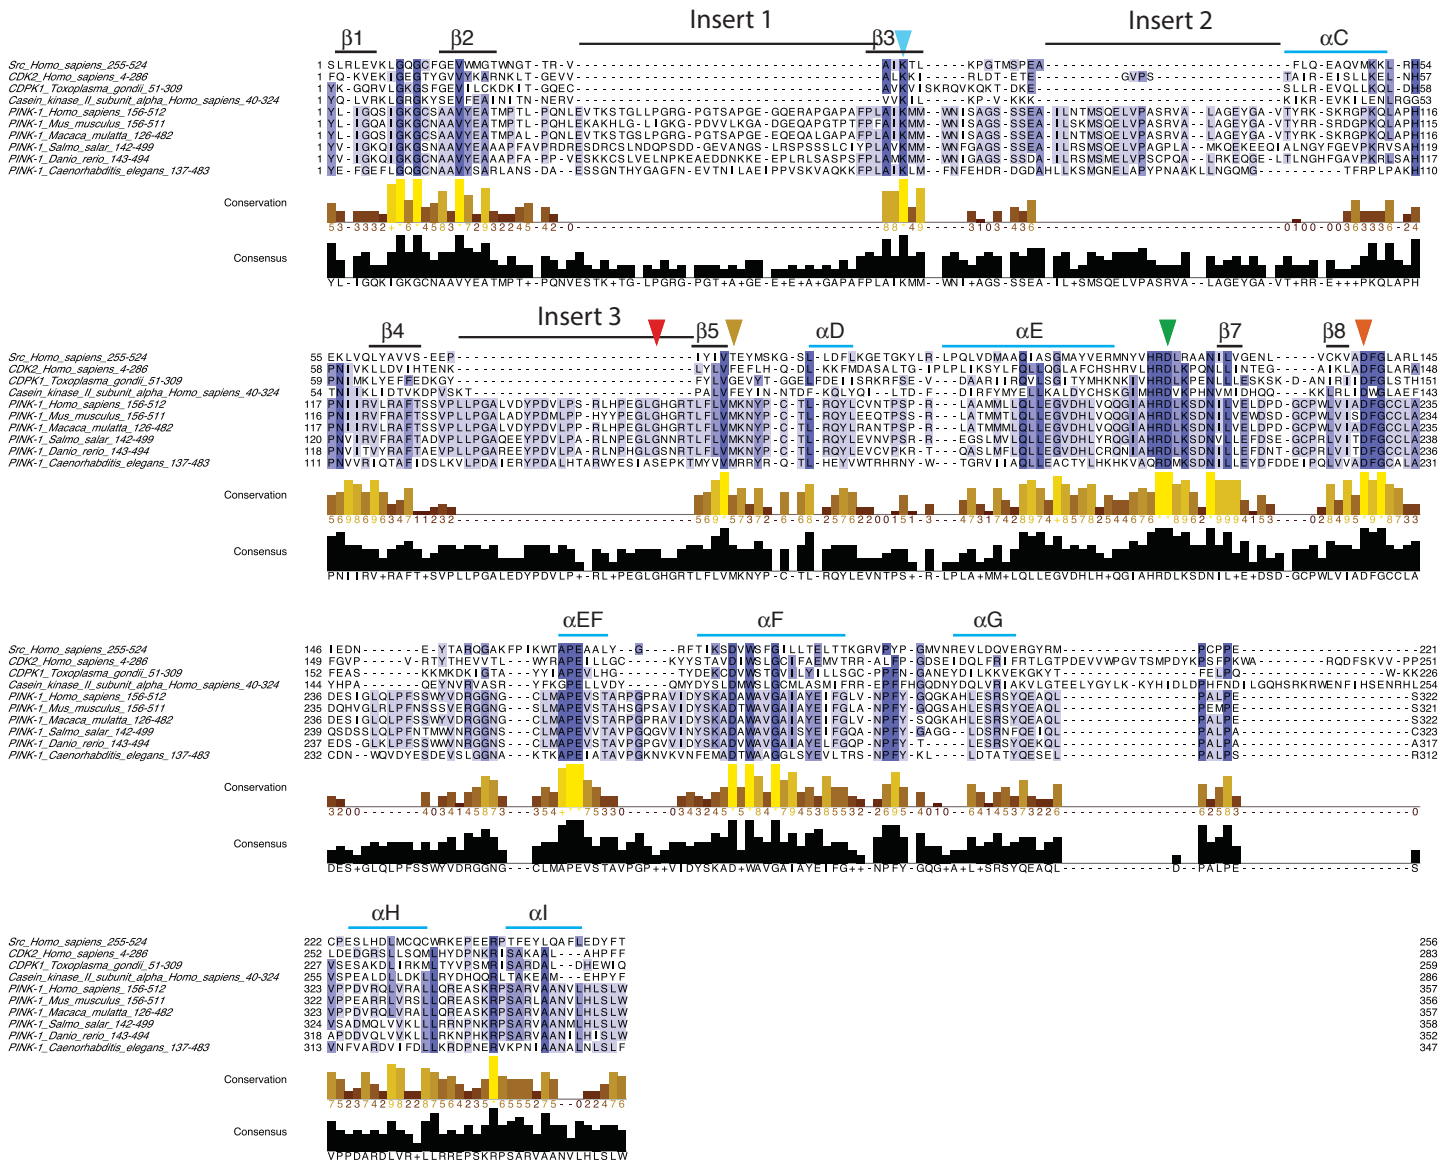

B

| kinase  | Accept N <sup>6</sup> modified ATP analog? |           |                          | Reference            |
|---------|--------------------------------------------|-----------|--------------------------|----------------------|
|         | wt-kinase                                  | as-kinase | Gatekeeper (Suppressive) |                      |
| PINK1   | Yes                                        | NA        | NA                       | NA                   |
| Fyn     | No                                         | Yes       | T339G                    | Liu, 1998            |
| vSrc    | No                                         | Yes       | I338G                    | Shah, 1997           |
| PKCδ    | No                                         | Yes       | M425A                    | Allen, 2007          |
| CDC5    | No                                         | Yes       | L158G                    | Allen, 2007          |
| JNK1    | No                                         | Yes       | M108G(L168A)             | Allen, 2007          |
| ERK2    | No                                         | Yes       | Q103G                    | Allen, 2007          |
| PKA     | No                                         | Yes       | M120G                    | Koller, 2007         |
| PKD1    | No                                         | Yes       | L159G                    | Tamgüney, 2008       |
| CDK1    | No                                         | Yes       | F80G                     | Blethrow, 2008       |
| AMPKα2  | No                                         | Yes       | M93G                     | Banko, 2011          |
| AuroraB | No                                         | Yes       | L145G(H250Y)             | Hengevold, 2012      |
| NDR1/2  | No                                         | Yes       | M166A(M152L,S229A)       | Ultanir, 2012        |
| αPKC    | No                                         | Yes       | I613A                    | Cibrián Uhalte, 2012 |
| GSK3β   | No                                         | Yes       | L132A                    | Kaasik, 2013         |
| LKB1    | No                                         | Yes       | unpub                    | unpub                |
| AKT     | No                                         | Yes       | unpub                    | unpub                |
| CLK1    | No                                         | Yes       | unpub                    | unpub                |

Figure S1: Related to Figure 1
