# Supplementary material
Source: PubMed Central journal article supplement (PMC3950538)
Supplement: NIHMS554991-supplement-Figure_S4.pdf [file NIHMS554991-supplement-Figure_S4.pdf]

☐ = 5  $\mu$ M CCCP addition

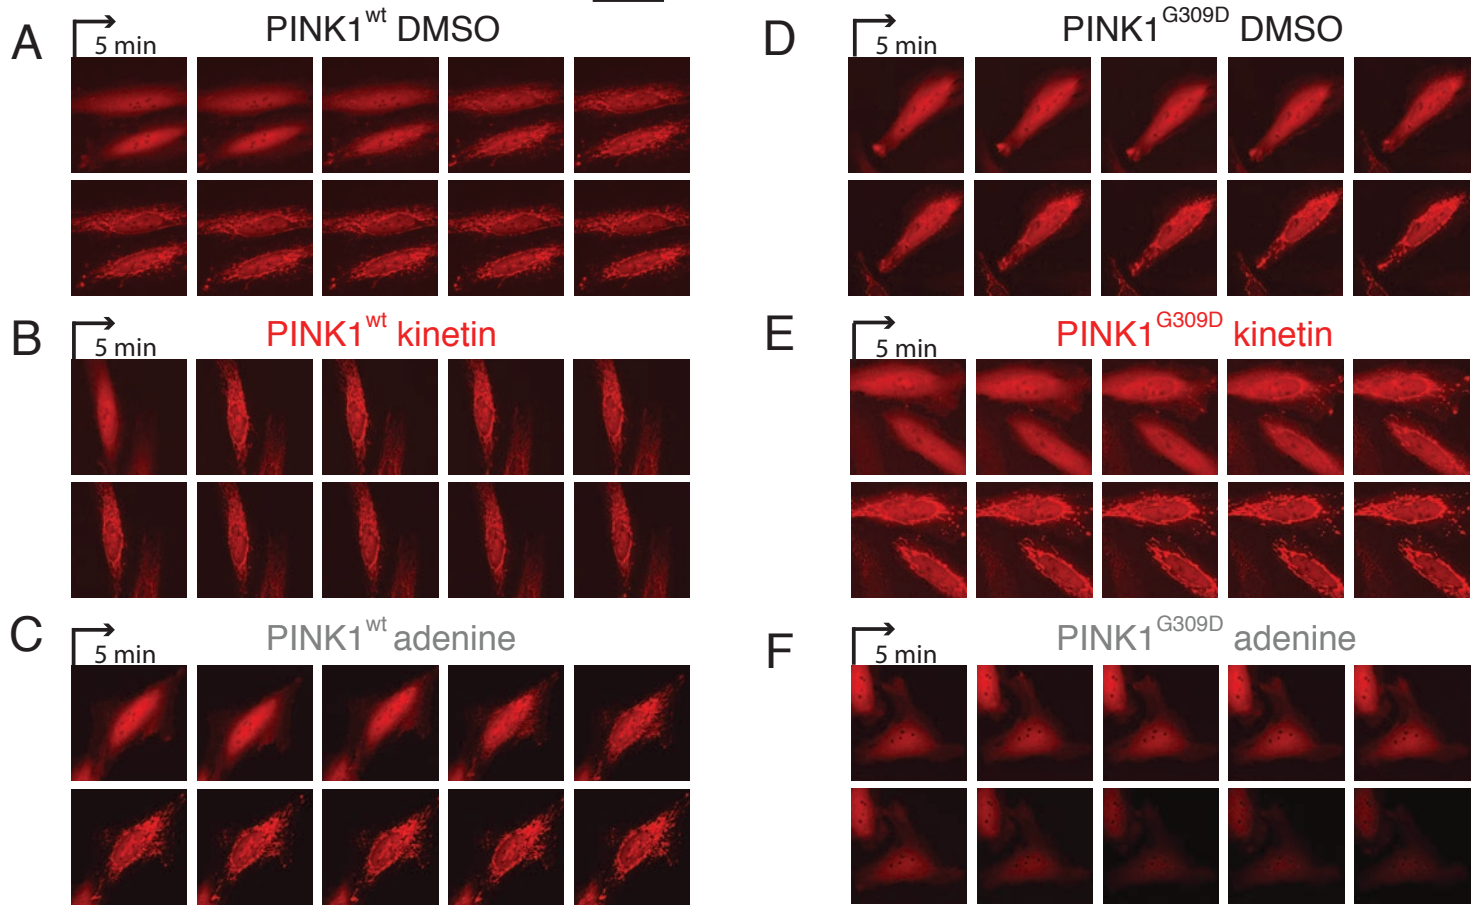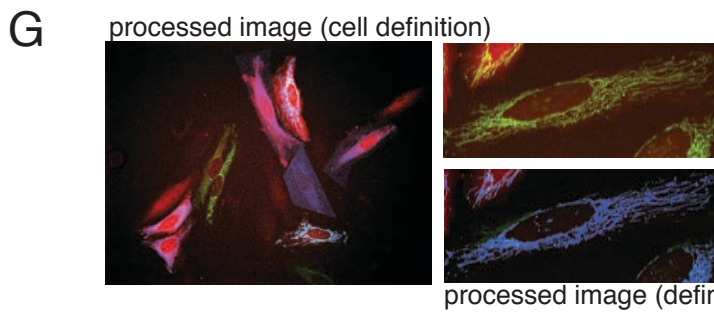

co-localization =  $\frac{\text{(mCherry Parkin on mitochondria)}}{\text{(total mCherry Parkin)}}$

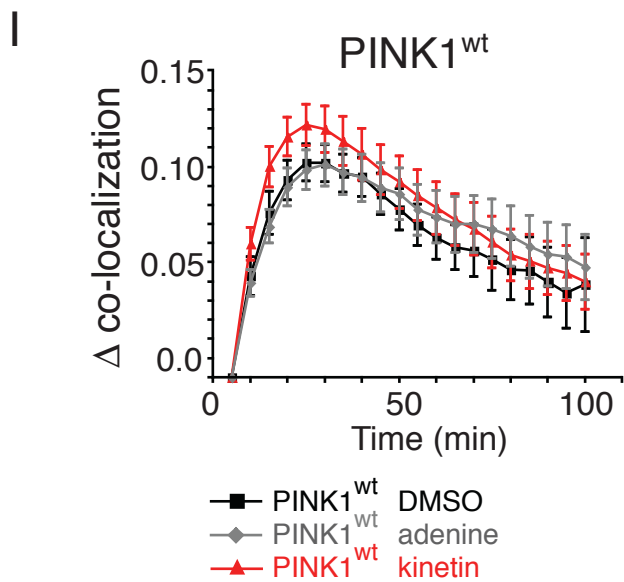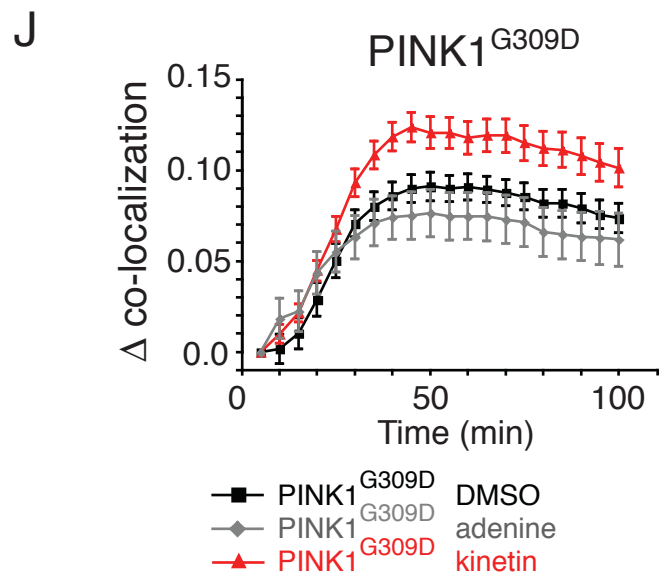

Figure S4: Related to Figure 3 and Table 2
