# Supplementary material
Source: PubMed Central journal article supplement (PMC3950538)

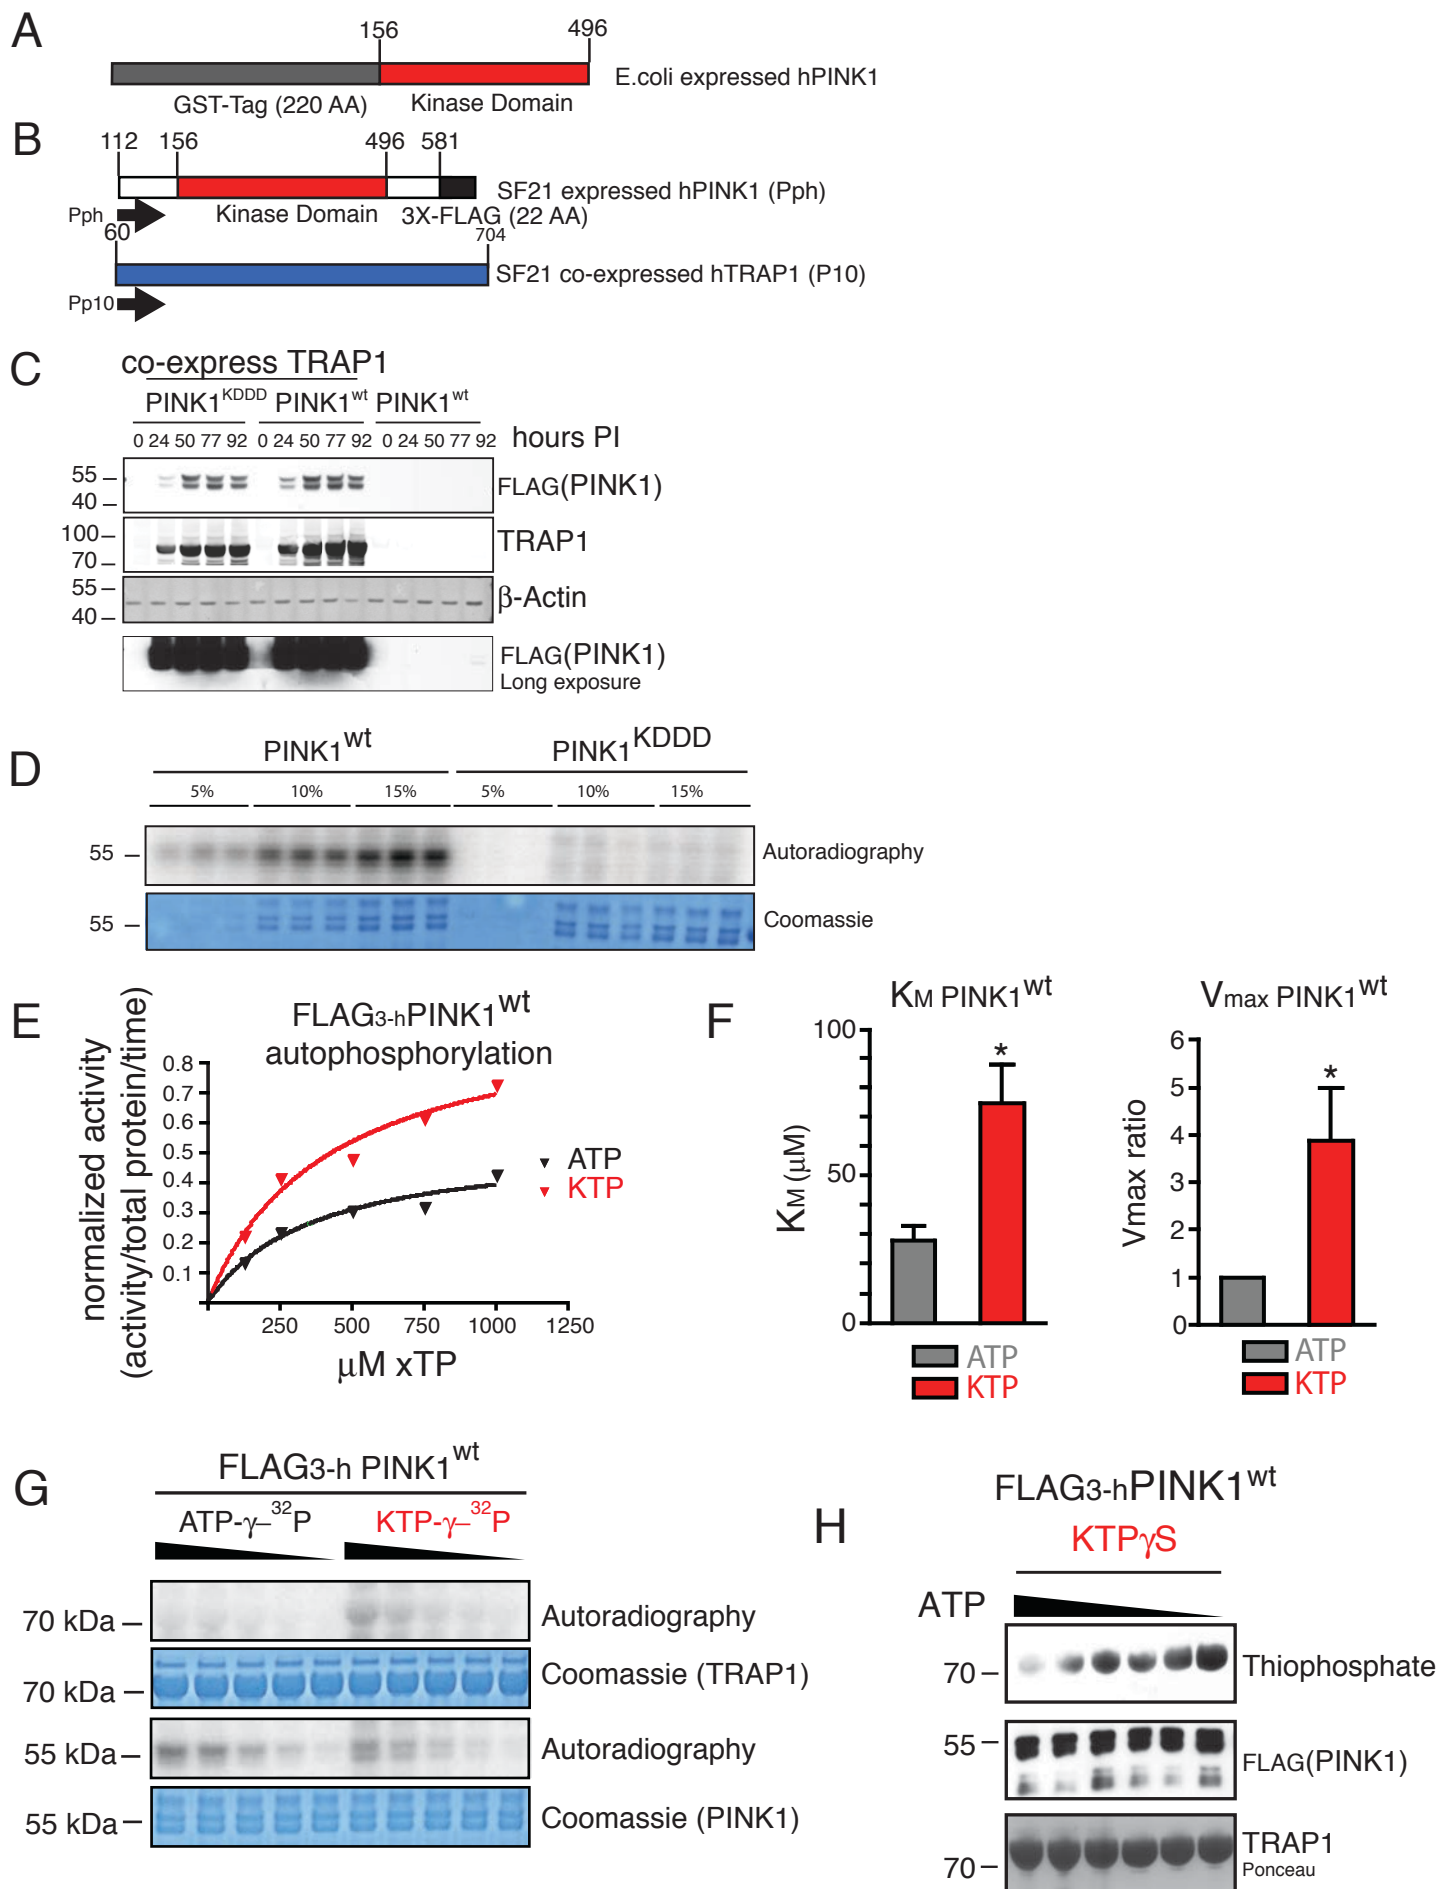

Figure S2: Related to Figure 1

Supplement: NIHMS554991-supplement-Figure_S2.pdf [file NIHMS554991-supplement-Figure_S2.pdf]

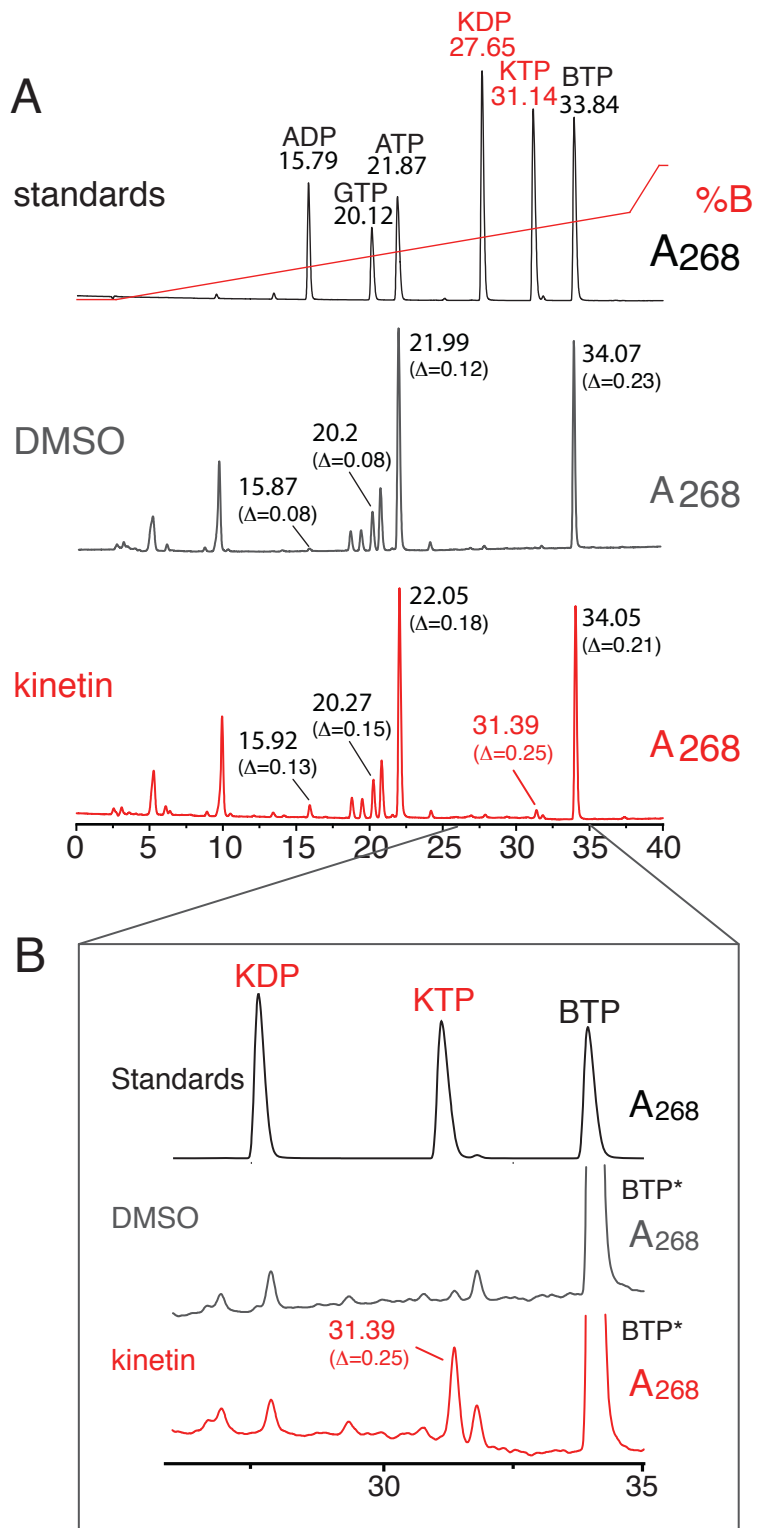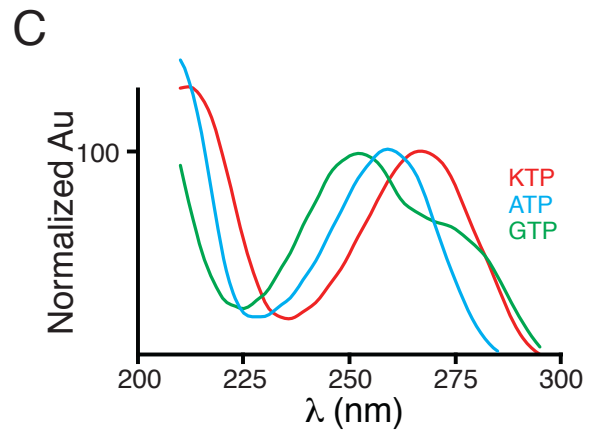

Figure S3: Related to Figure 2 and Table 1

Supplement: NIHMS554991-supplement-Figure_S3.pdf [file NIHMS554991-supplement-Figure_S3.pdf]

A

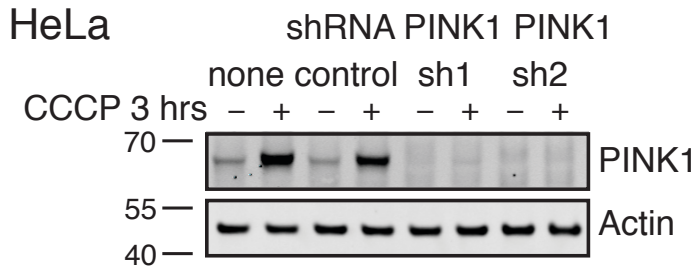

B

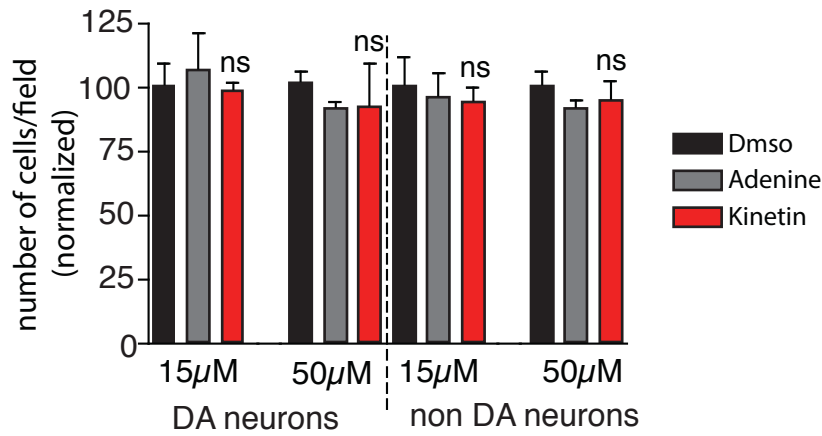

C

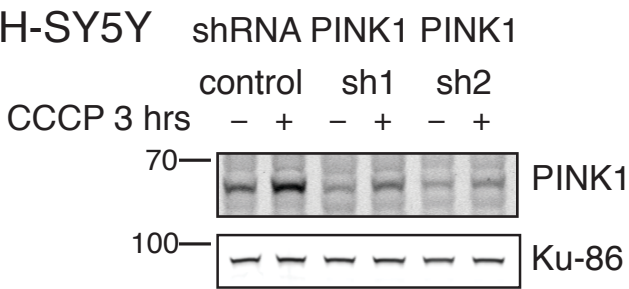

D

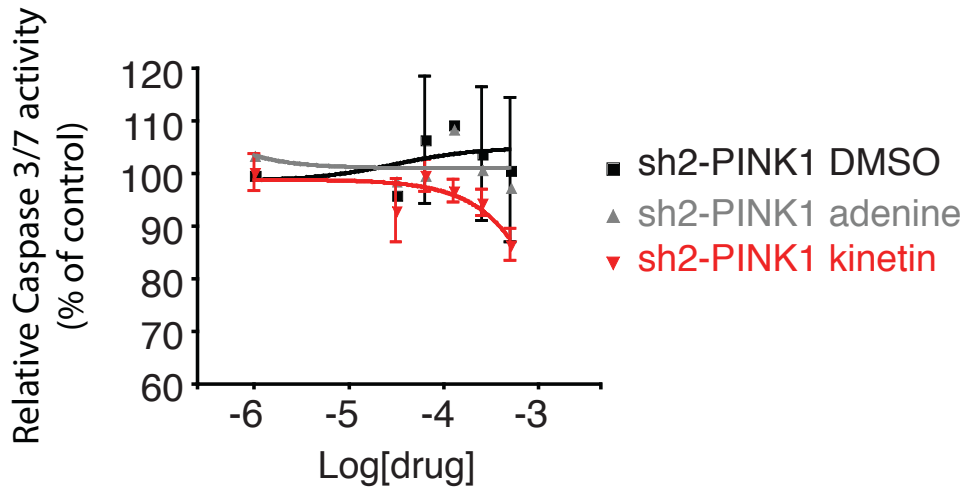

Figure S6: Related to Figure 5

Supplement: NIHMS554991-supplement-Figure_S6.pdf [file NIHMS554991-supplement-Figure_S6.pdf]
